# Supplementary material for: Global Statistics for Lip, Oral Cavity, Salivary Glands, and Oropharyngeal Cancers by Age Group: A Population-Based Study
Source: Research Square preprint supplement (doi:10.21203/rs.3.rs-8272780/v1), 2026-01-25
Supplement: Supplementary file 1 [file 8ec159fe353af0d1122659b2.xlsx]

## Sheet: Sheet1
Supplementary Tables S1-S13
Table S1 The global incidence of LOC-SG-OP cancers by age group, 2022.
Cancer types	Estimated new cases (Age-Standardized Rate per 100,000 people per year)
	15-29 years			30-44 years			45-59 years			60-74 years			15-74 years
	Both sexes	Males	Females	Both sexes	Males	Females	Both sexes	Males	Females	Both sexes	Males	Females	Both sexes	Males	Females
LOC-SG-OP	9127 (0.51)	5505 (0.59)	3622 (0.42)	60589 (3.80)	44594 (5.50)	15995 (2.00)	175922 (12.80)	130893 (19.10)	45029 (6.50)	209169 (25.50)	148958 (38.00)	60211 (13.90)	454807 (7.50)	329950 (11.10)	124857 (4.00)
Lip, oral cavity	5433 (0.30)	3707 (0.40)	1726 (0.20)	46254 (2.90)	35533 (4.30)	10721 (1.40)	123776 (9.00)	91539 (13.40)	32237 (4.70)	145368 (17.70)	100420 (25.60)	44948 (10.40)	320831 (5.30)	231199 (7.80)	89632 (2.90)
Salivary glands	3073 (0.17)	1410 (0.15)	1663 (0.19)	7363 (0.45)	3606 (0.43)	3757 (0.46)	14399 (1.10)	8029 (1.20)	6370 (0.93)	18268 (2.20)	11012 (2.80)	7256 (1.70)	43103 (0.72)	24057 (0.81)	19046 (0.63)
Oropharynx	621 (0.03)	388 (0.04)	233 (0.03)	6972 (0.44)	5455 (0.68)	1517 (0.19)	37747 (2.70)	31325 (4.50)	6422 (0.93)	45533 (5.60)	37526 (9.60)	8007 (1.90)	90873 (1.50)	74694 (2.50)	16179 (0.52)
LOC-SG-OP, lip, oral cavity, salivary glands, and oropharynx.
Table S2 The global mortalitry of LOC-SG-OP cancer by age group, 2022.
Cancer types	Estimated deaths (Age-Standardized Rate per 100,000 people per year)
	15-29 years			30-44 years			45-59 years			60-74 years			15-74 years
	Both sexes	Males	Females	Both sexes	Males	Females	Both sexes	Males	Females	Both sexes	Males	Females	Both sexes	Males	Females
LOC-SG-OP	3296 (0.18)	2167 (0.23)	1129 (0.13)	24190 (1.50)	18542 (2.30)	5648 (0.71)	82391 (6.00)	62431 (9.10)	19960 (2.90)	100925 (12.30)	73405 (18.70)	27520 (6.40)	210802 (3.50)	156545 (5.30)	54257 (1.70)
Lip, oral cavity	2471 (0.14)	1757 (0.19)	714 (0.08)	20030 (1.20)	15698 (1.90)	4332 (0.55)	59691 (4.40)	44635 (6.50)	15056 (2.20)	69528 (8.50)	48957 (12.50)	20571 (4.80)	151720 (2.50)	111047 (3.70)	40673 (1.30)
Salivary glands	638 (0.04)	299 (0.03)	339 (0.04)	1672 (0.10)	875 (0.11)	797 (0.10)	5751 (0.41)	3440 (0.50)	2311 (0.33)	8725 (1.10)	5337 (1.40)	3388 (0.78)	16786 (0.27)	9951 (0.33)	6835 (0.22)
Oropharynx	187 (0.01)	111 (0.01)	76 (0.01)	2488 (0.16)	1969 (0.25)	519 (0.07)	16949 (1.20)	14356 (2.10)	2593 (0.37)	22672 (2.80)	19111 (4.90)	3561 (0.83)	42296 (0.69)	35547 (1.20)	6749 (0.22)
LOC-SG-OP, lip, oral cavity, salivary glands, and oropharynx.
Table S3. High-burden countries/regions for LOC-SG-OP cancers in 15-29 years group, 2022.
Country	New cases	ASIR	Deaths	ASMR
Chad	69	1.3	45	0.87
Burkina Faso	73	1.3	28	0.51
Pakistan	616	0.98	338	0.54
Mozambique	69	0.75	54	0.59
Solomon Island	1	0.5	1	0.5
India	3139	0.85	1706	0.46
LOC-SG-OP, lip, oral cavity, salivary glands, and oropharynx; ASIR, age-standardized incidence rate; ASMR, age-standardized mortality rate
Table S4. High-burden countries/regions for LOC-SG-OP cancers in 30-44 years group, 2022.
Country	New cases	ASIR	Deaths	ASMR
India	30265	9.9	2142	5.1
Pakistan	3873	9.1	13970	4.6
Bangladesh	3185	8.6	1641	4.4
Solomon Island	4	3.3	4	3.3
Belarus	132	6.3	63	3
Afghanistan	296	4.3	153	2.5
LOC-SG-OP, lip, oral cavity, salivary glands, and oropharynx; ASIR, age-standardized incidence rate; ASMR, age-standardized mortality rate
Table S5. High-burden countries/regions for LOC-SG-OP cancers in 45-59 years group, 2022.
Country	New cases	ASIR	Deaths	ASMR
Papua New Guinea	699	62.3	192	17.1
Slovakia	407	35.3	174	15
Bangladesh	8767	33.6	5450	20.9
Pakistan	7136	27.2	4671	17.8
India	63278	29	37315	17.1
Belarus	524	26.5	325	16.4
LOC-SG-OP, lip, oral cavity, salivary glands, and oropharynx; ASIR, age-standardized incidence rate; ASMR, age-standardized mortality rate
Table S6. High-burden countries/regions for LOC-SG-OP cancers in 60-74 years group, 2022.
Country	New cases	ASIR	Deaths	ASMR
Papua New Guinea	408	82.3	191	38.8
Bangladesh	6421	60.9	4160	39.4
Hungary	906	51.2	424	24.1
India	60202	50.7	36862	31.1
Namibia	49	41	34	28.5
Pakistan	4842	38.8	3298	26.5
LOC-SG-OP, lip, oral cavity, salivary glands, and oropharynx; ASIR, age-standardized incidence rate; ASMR, age-standardized mortality rate
Table S7. Global incidence of LOC-SG-OP cancers by HDI category and age group, 2022.
HDI category	Estimated new cases (Age-Standardized Rate per 100,000 people per year)
	15-29 years	30-44 years	45-59 years	60-74 years	15-74 years
Total	9127 (0.51)	60589 (3.80)	175922 (12.80)	209169 (25.50)	454807 (7.50)
Very High HDI	1324 (0.43)	9108 (2.70)	49808 (14.60)	81306 (30.90)	141546 (8.30)
High HDI (but China)	1350 (0.42)	5701 (1.90)	19604 (8.40)	22873 (17.80)	49528 (5.00)
China	890 (0.37)	4044 (1.30)	16979 (4.70)	22711 (10.90)	44624 (3.00)
Medium HDI (but India)	668 (0.29)	5412 (3.30)	15219 (13.30)	13061 (24.30)	34360 (7.20)
India	3139 (0.85)	30265 (9.90)	63278 (29.00)	60202 (50.70)	156884 (16.30)
Low HDI	1756 (0.54)	6059 (3.20)	11034 (10.10)	9016 (18.00)	27865 (5.70)
LOC-SG-OP, lip, oral cavity, salivary glands, and oropharynx; HDI, Human Development Index
Table S8. Global mortality of LOC-SG-OP cancers by HDI category and age group, 2022.
HDI category	Estimated deaths (Age-Standardized Rate per 100,000 people per year)
	15-29 years	30-44 years	45-59 years	60-74 years	15-74 years
Total	3296 (0.18)	24190 (1.50)	82391 (6.00)	100925 (12.30)	210802 (3.50)
Very High HDI	104 (0.03)	1812 (0.53)	13871 (4.00)	25833 (9.80)	41620 (2.40)
High HDI (but China)	296 (0.09)	1767 (0.59)	8689 (3.70)	11674 (9.10)	22426 (2.30)
China	99 (0.04)	982 (0.32)	6767 (1.80)	11882 (5.60)	19730 (1.30)
Medium HDI (but India)	206 (0.09)	2476 (1.50)	8531 (7.40)	8145 (15.20)	19358 (4.10)
India	1706 (0.46)	13970 (4.60)	37315 (17.10)	36862 (31.10)	89853 (9.40)
Low HDI	885 (0.27)	3183 (1.70)	7218 (6.60)	6529 (13.10)	17815 (3.80)
LOC-SG-OP, lip, oral cavity, salivary glands, and oropharynx; HDI, Human Development Index
Table S9. Global incidence of LOC-SG-OP cancers by HDI category, cancer type, and age group, 2022.
HDI category	Estimated new cases (Age-Standardized Rate per 100,000 people per year)
	15-29 years			30-44 years			45-59 years			60-74 years			15-74 years
	LOC	SG	OP	LOC	SG	OP	LOC	SG	OP	LOC	SG	OP	LOC	SG	OP
Total	5433 (0.30)	3073 (0.17)	621 (0.03)	46254 (2.90)	7363 (0.45)	6972 (0.44)	123776 (9.00)	14399 (1.10)	37747 (2.70)	145368 (17.70)	18268 (2.20)	45533 (5.60)	320831 (5.30)	43103 (0.72)	90873 (1.50)
Very High HDI	676 (0.22)	601 (0.20)	47 (0.02)	5335 (1.60)	1638 (0.48)	2135 (0.63)	28558 (8.40)	3932 (1.20)	17318 (5.10)	49870 (18.8)	6895 (2.60)	24541 (9.50)	84439 (4.90)	13066 (0.81)	44041 (2.60)
High HDI (but China)	595 (0.19)	599 (0.19)	156 (0.05)	3262 (1.10)	1355 (0.44)	1084 (0.37)	11965 (5.20)	2458 (1.10)	5181 (2.20)	14989 (11.7)	2699 (2.10)	5185 (4.00)	30811 (3.10)	7111 (0.71)	11606 (1.20)
China	338 (0.14)	485 (0.20)	67 (0.03)	2336 (0.75)	1313 (0.42)	395 (0.13)	10899 (3.00)	3359 (0.95)	2721 (0.74)	15489 (7.40)	3758 (1.80)	3464 (1.70)	29062 (1.90)	8915 (0.64)	6647 (0.44)
Medium HDI (but India)	319 (0.14)	292 (0.13)	57 (0.02)	3751 (2.30)	722 (0.42)	939 (0.58)	10762 (9.40)	1224 (1.10)	3233 (2.80)	9467 (17.60)	1126 (2.10)	2468 (4.60)	24299 (5.10)	3364 (0.68)	6697 (1.40)
India	2424 (0.65)	590 (0.16)	125 (0.03)	26788 (8.70)	1482 (0.48)	1995 (0.67)	52681 (24.20)	2372 (1.10)	8225 (3.80)	48345 (40.7)	2579 (2.20)	9278 (7.80)	130238 (13.50)	7023 (0.72)	19623 (2.10)
Low HDI	1081 (0.33)	506 (0.15)	169 (0.05)	4782 (2.50)	853 (0.43)	424 (0.23)	8911 (8.10)	1054 (0.96)	1069 (0.98)	7208 (14.4)	1211 (2.40)	597 (1.20)	21982 (4.60)	3624 (0.71)	2259 (0.46)
LOC, lip, oral cavity; SG, salivary glands; OP, oropharynx; HDI, Human Development Index
Table S10. Global mortality of LOC-SG-OP cancers by HDI category, cancer type, and age group, 2022.
HDI category	Estimated deaths (Age-Standardized Rate per 100,000 people per year)
	15-29 years			30-44 years			45-59 years			60-74 years			15-74 years
	LOC	SG	OP	LOC	SG	OP	LOC	SG	OP	LOC	SG	OP	LOC	SG	OP
Total	2471 (0.14)	638 (0.04)	187 (0.01)	20030 (1.20)	1672 (0.10)	2488 (0.16)	59691 (4.40)	5751 (0.41)	16949 (1.20)	69528 (8.50)	8725 (1.10)	22672 (2.80)	151720 (2.50)	16786 (0.27)	42296 (0.69)
Very High HDI	84 (0.03)	17 (0.01)	3 (0.00)	1169 (0.34)	226 (0.07)	417 (0.12)	7780 (2.30)	1018 (0.30)	5073 (1.50)	14537 (5.50)	2327 (0.86)	8969 (3.40)	23570 (1.40)	3588 (0.20)	14462 (0.82)
High HDI (but China)	142 (0.04)	130 (0.04)	24 (0.01)	1058 (0.36)	303 (0.10)	406 (0.14)	5196 (2.20)	869 (0.37)	2624 (1.10)	7245 (5.60)	1171 (0.91)	3258 (2.50)	13641 (1.40)	2473 (0.25)	6312 (0.63)
China	51 (0.02)	26 (0.01)	22 (0.01)	681 (0.22)	166 (0.05)	135 (0.04)	4557 (1.20)	873 (0.24)	1337 (0.36)	8239 (3.90)	1480 (0.68)	2163 (1.00)	13528 (0.86)	2545 (0.16)	3657 (0.23)
Medium HDI (but India)	128 (0.06)	64 (0.03)	14 (0.01)	1783 (1.10)	213 (0.13)	480 (0.30)	5932 (5.20)	692 (0.60)	1907 (1.70)	5759 (10.70)	745 (1.40)	1641 (3.10)	13602 (2.90)	1714 (0.37)	4042 (0.86)
India	1460 (0.39)	189 (0.05)	57 (0.02)	12638 (4.10)	472 (0.15)	860 (0.29)	30408 (13.90)	1541 (0.70)	5366 (2.50)	28678 (24.20)	1965 (1.70)	6219 (5.20)	73184 (7.60)	4167 (0.44)	12502 (1.30)
Low HDI	606 (0.18)	212 (0.06)	67 (0.02)	2701 (1.40)	292 (0.15)	190 (0.10)	5818 (5.30)	758 (0.69)	642 (0.59)	5070 (10.10)	1037 (2.10)	422 (0.84)	14195 (3.00)	2299 (0.50)	1321 (0.28)
LOC, lip, oral cavity; SG, salivary glands; OP, oropharynx; HDI, Human Development Index
Table S11. Associations between the incidence-mortality ratio and the HDI by age group.
Age group	Both sexes		Males		Females
	Spearman's ρ	p-value	Spearman's ρ	p-value	Spearman's ρ	p-value
15-74 years	-0.787	< 0.001	-0.745	< 0.001	-0.808	< 0.001
15-29 years	-0.65	< 0.001	-0.636	< 0.001	-0.612	< 0.001
30-44 years	-0.61	< 0.001	-0.55	< 0.001	-0.655	< 0.001
45-59 years	-0.69	< 0.001	-0.652	< 0.001	-0.732	< 0.001
60-74 years	-0.79	< 0.001	-0.76	< 0.001	-0.818	< 0.001
HDI, Human Development Index
Table S12. Area under the curve (AUC) of concentration curves for LOC-SG-OP cancers by age group and sex.
Age group	AUC (95% CI)
	Both sexes	Males	Females
15-74 years	0.58 (0.54 to 0.62)	0.57 (0.53 to 0.62)	0.60 (0.55 to 0.63)
15-29 years	0.62 (0.54 to 0.69)	0.59 (0.52 to 0.68)	0.66 (0.59 to 0.71)
30-44 years	0.57 (0.53 to 0.64)	0.56 (0.52 to 0.63)	0.60 (0.54 to 0.66)
45-59 years	0.58 (0.54 to 0.63)	0.58 (0.54 to 0.63)	0.61 (0.55 to 0.65)
60-74 years	0.59 (0.54 to 0.62)	0.58 (0.53 to 0.62)	0.60 (0.56 to 0.63)
LOC-SG-OP, lip, oral cavity, salivary glands, and oropharynx
Table S13 HDI-related inequalities in mortality-incidence ratio by age group and sex.
Age group	Absolute concentration index			Relative concentration index
	Both	Males	Females	Both	Males	Females
15-74 years	-0.16 (-0.24 to -0.08)	-0.14 (-0.24 to -0.06)	-0.20 (-0.26 to -0.11)	-0.34 (-0.52 to -0.16)	-0.30 (-0.50 to -0.13)	-0.46 (-0.61 to -0.25)
15-29 years	-0.24 (-0.39 to -0.09)	-0.17 (-0.36 to -0.04)	-0.31 (-0.42 to -0.17)	-0.63 (-1.04 to -0.24)	-0.41 (-0.87 to -0.10)	-0.95 (-1.29 to -0.53)
30-44 years	-0.14 (-0.28 to -0.06)	-0.11 (-0.26 to -0.04)	-0.20 (-0.32 to -0.09)	-0.34 (-0.69 to -0.14)	-0.27 (-0.61 to -0.10)	-0.56 (-0.90 to -0.25)
45-59 years	-0.17 (-0.26 to -0.08)	-0.15 (-0.25 to -0.07)	-0.21 (-0.30 to -0.10)	-0.36 (-0.56 to -0.17)	-0.32 (-0.53 to -0.15)	-0.48 (-0.68 to -0.23)
60-74 years	-0.17 (-0.25 to -0.08)	-0.16 (-0.24 to -0.07)	-0.20 (-0.27 to -0.12)	-0.36 (-0.51 to -0.17)	-0.33 (-0.49 to -0.14	-0.44 (-0.59 to -0.25)
HDI, Human Development Index
